# Supplementary material for: (Fe1−xNix)3N nanoparticles: the structure, magnetic and photocatalytic properties for water splitting
Source: Royal Society of Chemistry journal article supplement (doi:10.1039/c6ra05990b), 2016-01-01
Supplement: c6ra05990b1.pdf [file c6ra05990b1.pdf]

## Supporting information

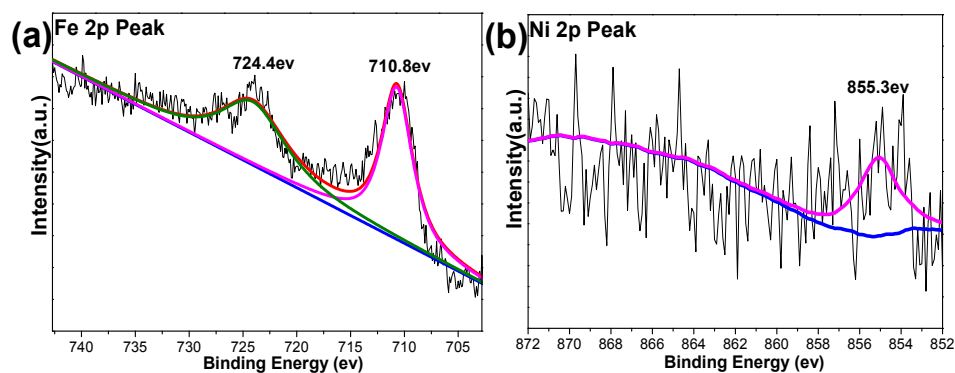

Fig.S1 XPS high-resolution spectra of the Fe 2p and Ni 2p regions of the as-prepared 10%  $\text{Fe}_{3(1-x)}\text{Ni}_x\text{N}$ , respectively.

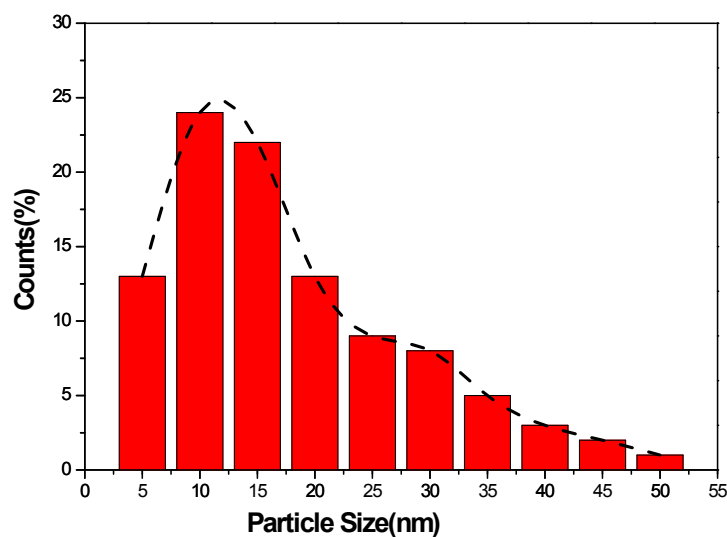

Fig.S2 The particle size distribution of 20%  $\text{Fe}_{3(1-x)}\text{Ni}_x\text{N}$  NPs.

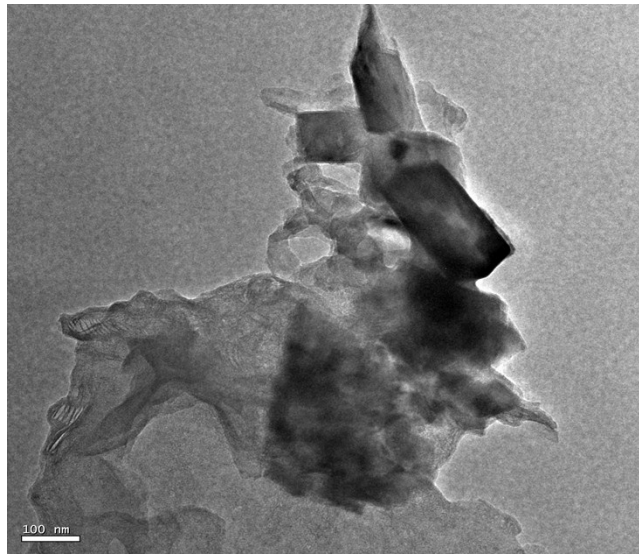

Fig.S3 HRTEM images of Fe<sub>3</sub>N

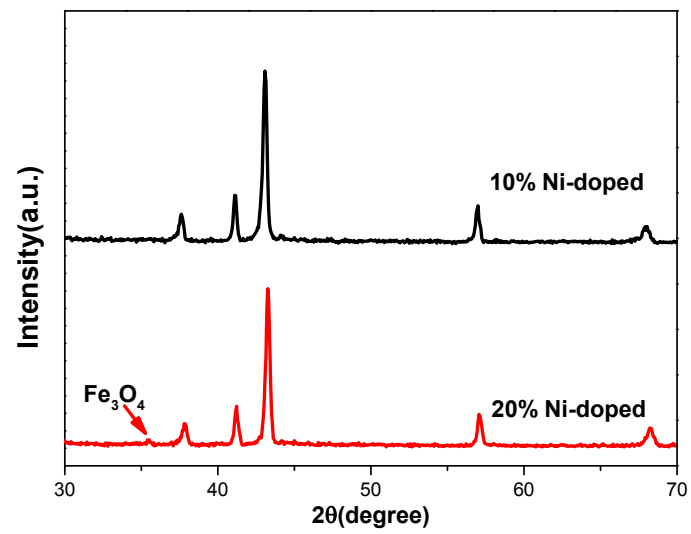

Fig.S4 XRD spectra of samples after catalysis
